# Supplementary material for: Comprehensive miRNA expression profiling in human T-cell acute lymphoblastic leukemia by small RNA-sequencing
Source: PubMed Central journal article supplement (PMC5554241; doi:10.1038/s41598-017-08148-x), 2017-08-11
Supplement: 41598_2017_8148_MOESM1_ESM.pdf [file 41598_2017_8148_MOESM1_ESM.pdf]

# **Comprehensive miRNA expression profiling in human T-cell acute lymphoblastic leukemia by small RNA-sequencing**

Annelynn Wallaert, Wouter Van Loocke, Lucie Hernandez, Tom Taghon, Frank Speleman and Pieter Van Vlierberghe

## Supplementary Figure S1

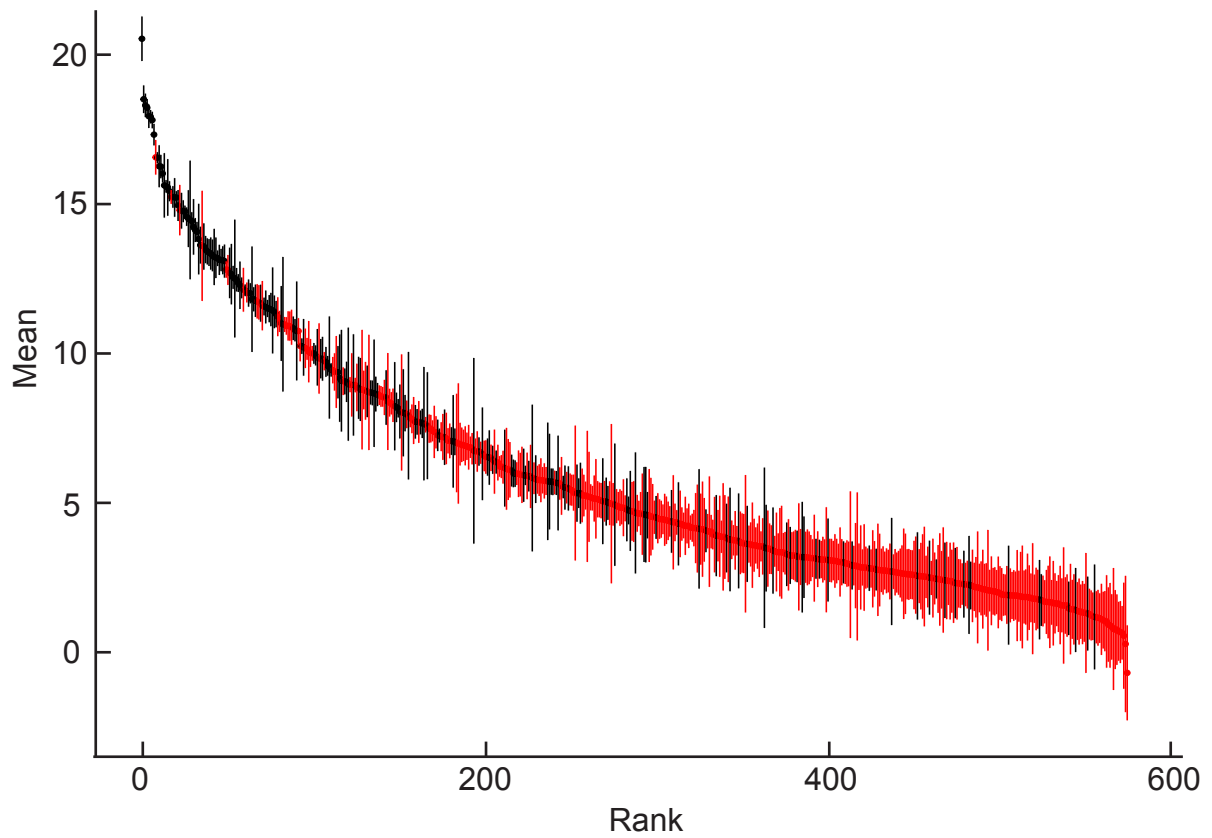

**Supplementary Figure S1.** Dot plot with standard deviation representing the mean normalized expression levels of all 574 miRNAs detected by small RNA-seq. The miRNAs are ranked from highest to lowest mean expression. Red dots/bars represent miRNAs that were not detected by an RT-qPCR platform from previous studies.

# Supplementary Figure S2

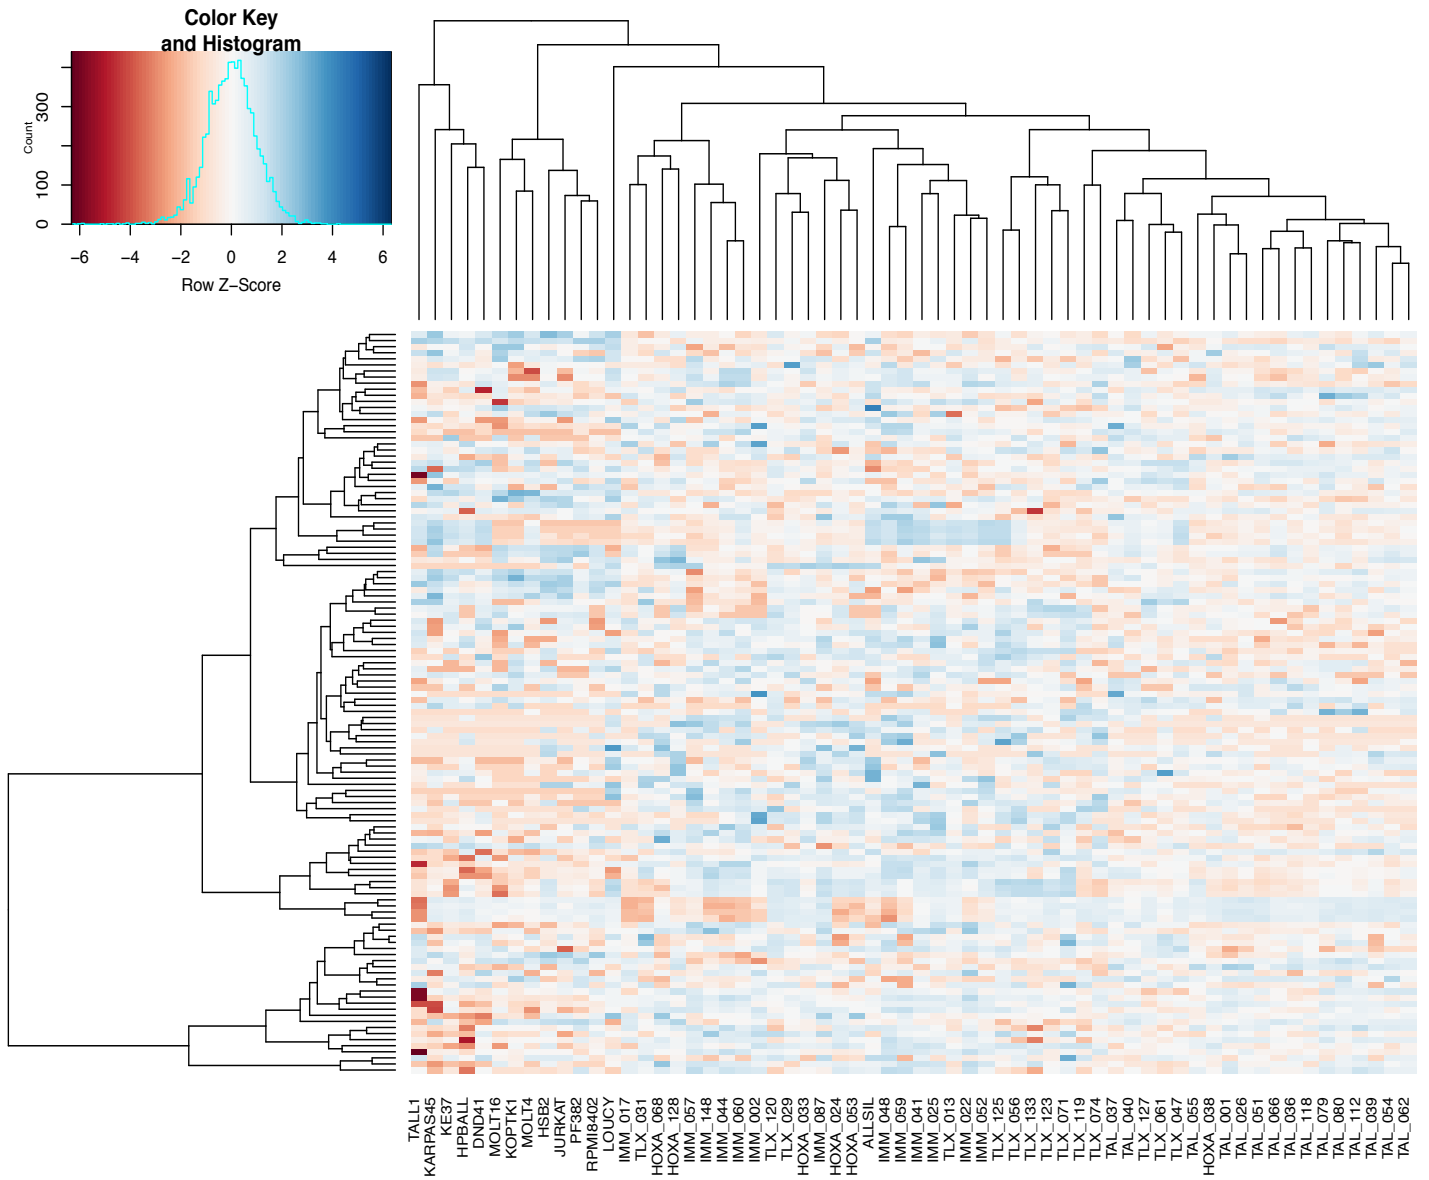

**Supplementary Figure S2.** Clustering of T-ALL patient samples and T-ALL cell lines using the expression of the T-ALL subtype specific miRNAs.

# Supplementary Figure S3

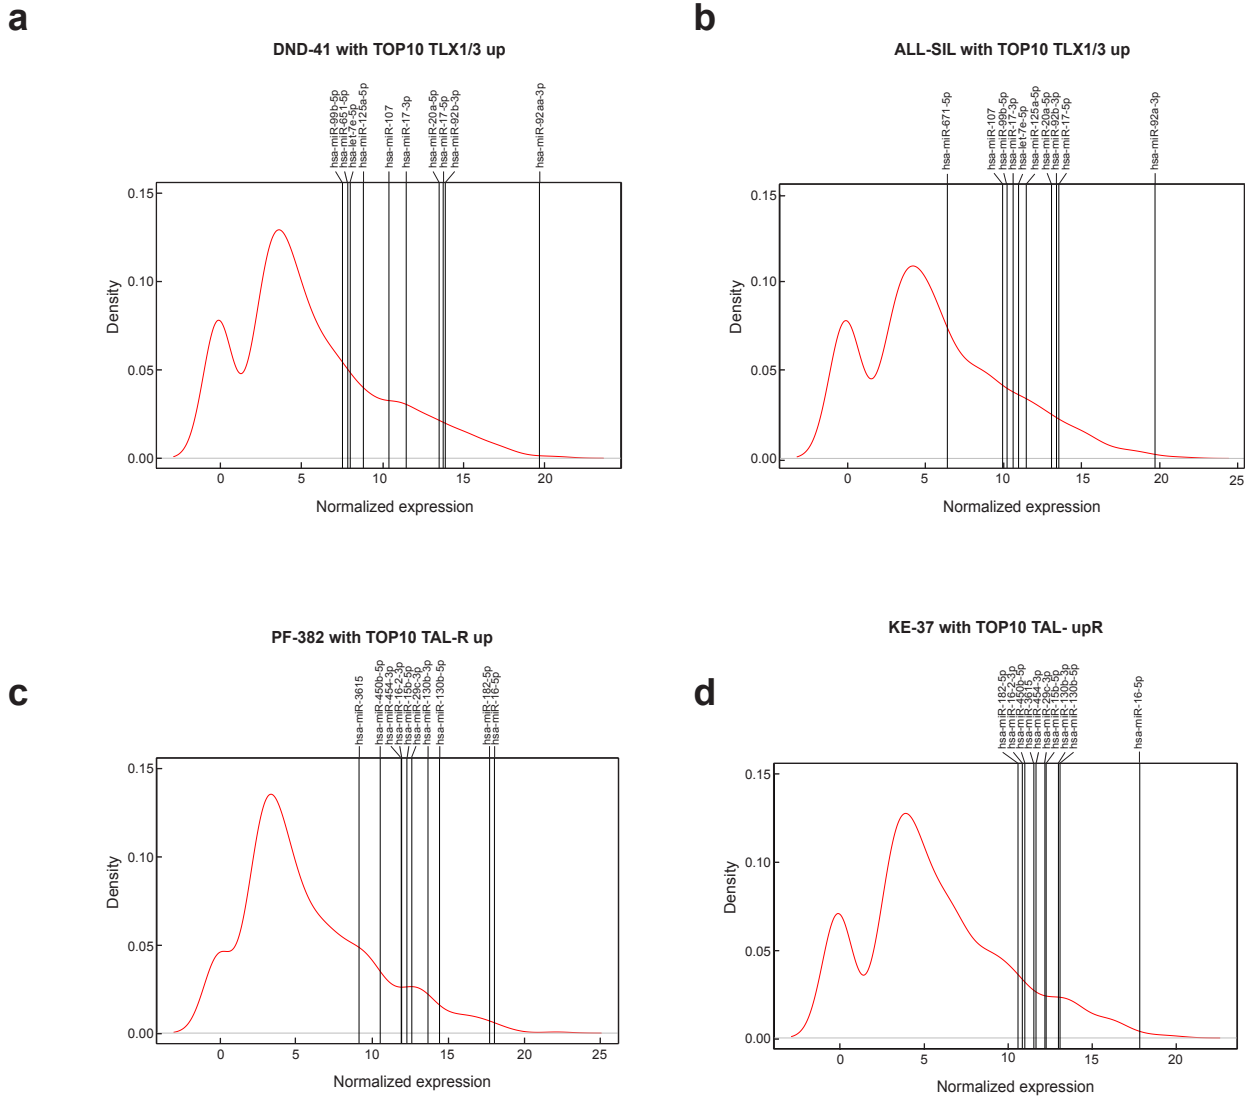

**Supplementary Figure S3. Subtype specific miRNAs are also represented in the T-ALL cell lines.** Density plots representing the distribution of the miRNA expression in the T-ALL cell lines DND-41, ALL-SIL, PF-382 and KE-37. Vertical bars show the expression level of the top 10 miRNAs selected for the subgroup these cell lines represent. DND-41 (A) and ALL-SIL (B) for the TLX subgroup and PF-382 (C) and KE-37 (D) for the TAL/LMO subgroup.

# Supplementary Figure S4

a

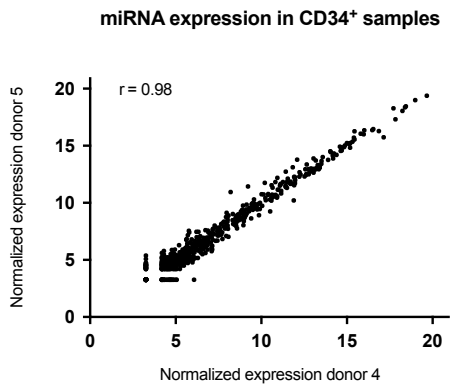

b

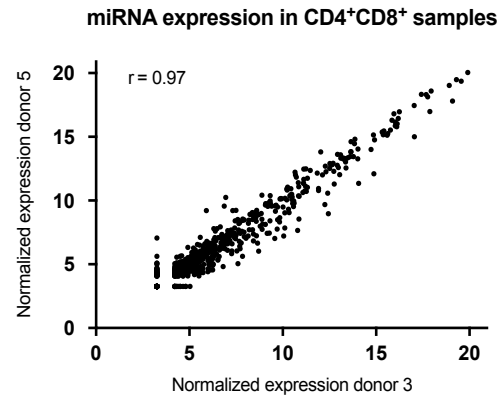

**Supplementary Figure S4. miRNA expression is highly correlated in 2 different donors.** Scatterplots representing the log<sub>2</sub> normalized expression of the miRNAs profiled by small RNA-sequencing for 2 different donors of CD34<sup>+</sup> thymocytes (A) and CD4<sup>+</sup>CD8<sup>+</sup> thymocytes (B).
